# Supplementary material
Source: publisher site journal article supplement (https://www.dovepress.com/get_supplementary_file.php?f=298876.docx)
Supplement: Supplementary file 1 [file get_supplementary_file.php]

**Supplement**

**Patient Experience Survey**

Important!

1) All answers should be marked with an "X" in the appropriate box after reading the question. Sometimes you will find an open answer question with some space for you to fill in the blanks. Please make sure you use clear handwriting.

2) Some questions are accompanied by comments to help you complete the survey correctly. They are marked in red italics, or diagonal letters, in brackets, e.g. (fill in the blanks). In case of any doubts - interviewer will try to explain them.

3) If you find this text impossible to read and therefore cannot provide your answers in writing, the interviewer will help in completing the questionnaire.

| L.p. | Question |  |
| --- | --- | --- |
| 1. | Whether admission to hospital went smoothly? | - Yes - No - Not sure |
| If not, why …………………………………… |
| 2. | Are you satisfied with the nursing interview? | - Yes - No - Not sure |
| If not, why …………………………………… |
| 3. | Whether you have been satisfactorily explained about the necessity to administer a multiple drops in your eye before surgery? | - Yes - No - Not sure |
| If not, why …………………………………… |
| 4. | Do you think, that multiple administration of eye drops before surgery was annoying? | - Yes - No - Not sure |
| If yes, why …………………………………… |
| 5. | What did you feel during administration of eye drops before surgery? | - Burning - Sharp pain - Water - Only 'feeling of flooding' eye - Pain - It was very unpleasant - Not sure - Other:…………………….   …………………….....………….............................................  *(you may choose more than one options)* |
| 6. | Whether you were satisfactorily explained by doctor what the cataract surgery is about? | - Yes - No - Not sure |
| If not, why …………………………………… |
| 7. | Whether the information on the artificial lens was clearly presented? | - Yes - No - Not sure |
| If not, why …………………………………… |
| 8. | Whether the information about cataract surgery complications was clearly presented? | - Yes - No - Not sure |
| If not, why …………………………………… |
| 9. | Were you satisfied with the doctor’s examination before surgery? | - Yes - No - Not sure |
| If not, why …………………………………… |
| 10. | Did the nurse anesthetist explained what activities will be conducted during the surgery? | - Yes - No - Not sure |
| 11. | Did the nurse anesthetist explained the rationale for these activities ? | - Yes - No - Not sure |
| 12 | What was the most unpleasant experience during the surgery? | - Intravenous cannulation - Inflating a sleeve of a manometer - Corneal cut - Artificial lens implantation - Peeling of sterile surgical drape - None   *(you may choose only one answer)* |
| 13. | Did you understand the orders given by the medical staff in the operating theater? | - Yes - No - Not sure |
| If not, why …………………………………… |
| 14. | Whether the cooperation in the operating theater with the medical staff was smooth? | - Yes - No - Not sure |
| If not, why …………………………………… |
